# Supplementary material for: Conversion of methoxy and hydroxyl functionalities of phenolic monomers over zeolites
Source: Royal Society of Chemistry journal article supplement (doi:10.1039/c5gc02548f), 2015-12-10
Supplement: c5gc02548f1.pdf [file c5gc02548f1.pdf]

## ***Supplementary Information***

### **Conversion of methoxy and hydroxyl functionalities of phenolic monomers over zeolites**

Rajeeva Thilakaratne <sup>1,2</sup>, Jean-Philippe Tessonnier <sup>2,3</sup>, Robert C. Brown <sup>1,2,3</sup>

*<sup>1</sup>Department of Mechanical Engineering*

*<sup>2</sup>Bioeconomy Institute*

*<sup>3</sup>Department of Chemical and Biological Engineering*

*Iowa State University*

*Ames, IA 50011*

#### **Table of contents**

|                                                                                                                                                                                                                        |               |
|------------------------------------------------------------------------------------------------------------------------------------------------------------------------------------------------------------------------|---------------|
| <b>Figure S1.</b> FID chromatogram showing intermediate peaks for anisole run over coked ZSM5 catalyst bed in pyrolysis at 600 <sup>0</sup> C (after five consecutive runs of 2mg anisole over the catalytic bed)..... | <b>Page 2</b> |
| <b>Figure S2.</b> MSD chromatogram showing water and other aromatic products for phenol pyrolysis over zeolites at 600 <sup>0</sup> C.....                                                                             | <b>Page 3</b> |
| <b>Figure S3.</b> Proposed mechanism for secondary phenol conversion pathway via 2,4-cylohexadienone phenol isomer (thermal route).....                                                                                | <b>Page 4</b> |
| <b>Figure S4.</b> MSD-EI spectrum for evolved phenol from phenol-1- <sup>13</sup> C and regular phenol during catalytic pyrolysis over zeolites.....                                                                   | <b>Page 5</b> |

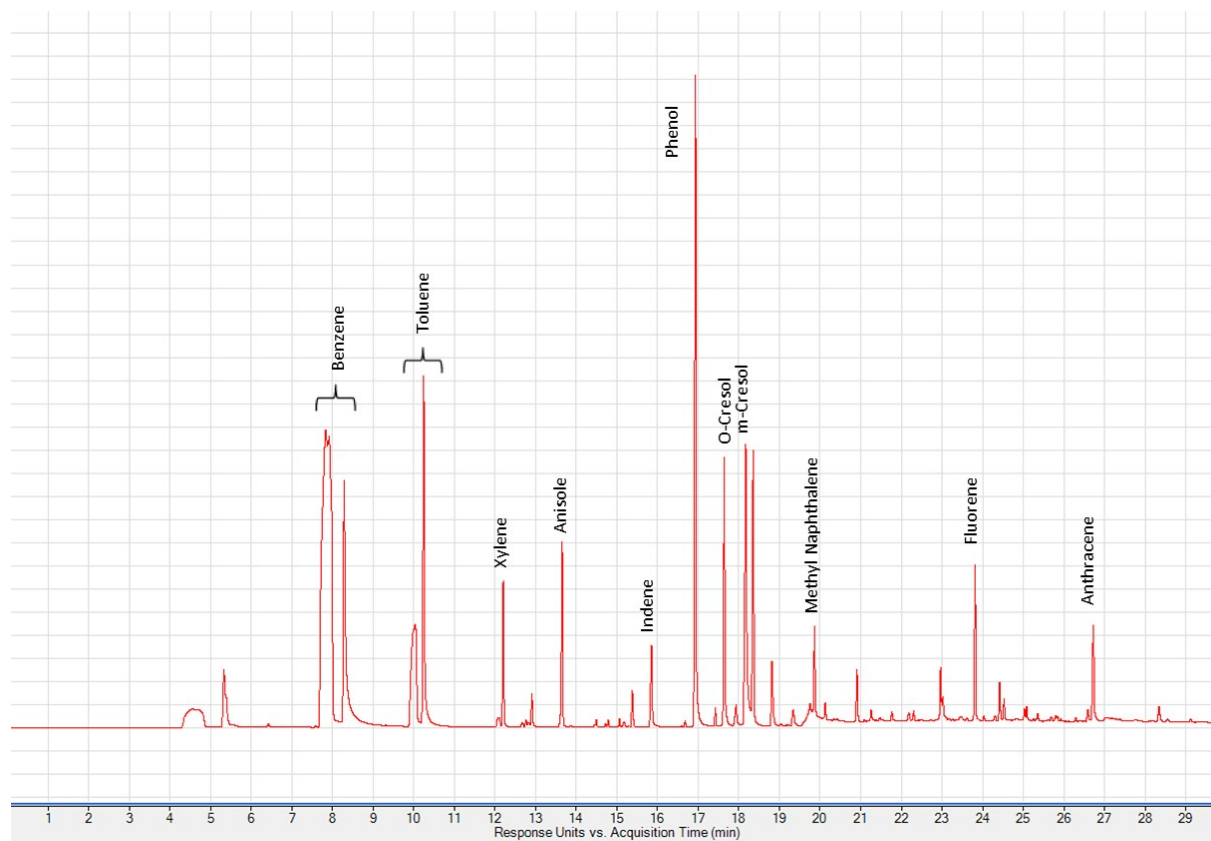

**Figure S1. FID chromatogram showing intermediate peaks for anisole run over coked ZSM5 catalyst bed in pyrolysis at 600°C (after five consecutive runs of 2mg anisole over the catalytic bed).**

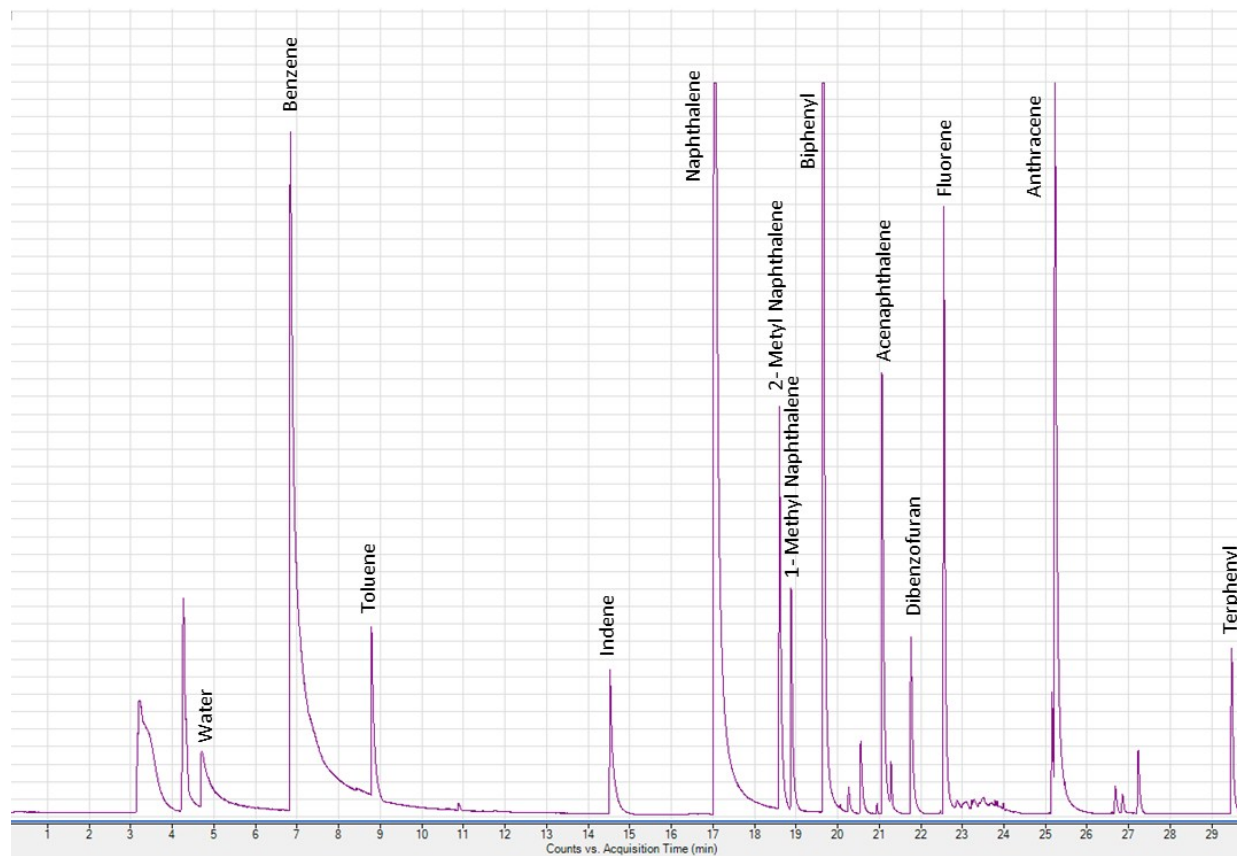

**Figure S2. MSD chromatogram showing water and other aromatic products for phenol pyrolysis over zeolites at 600°C**

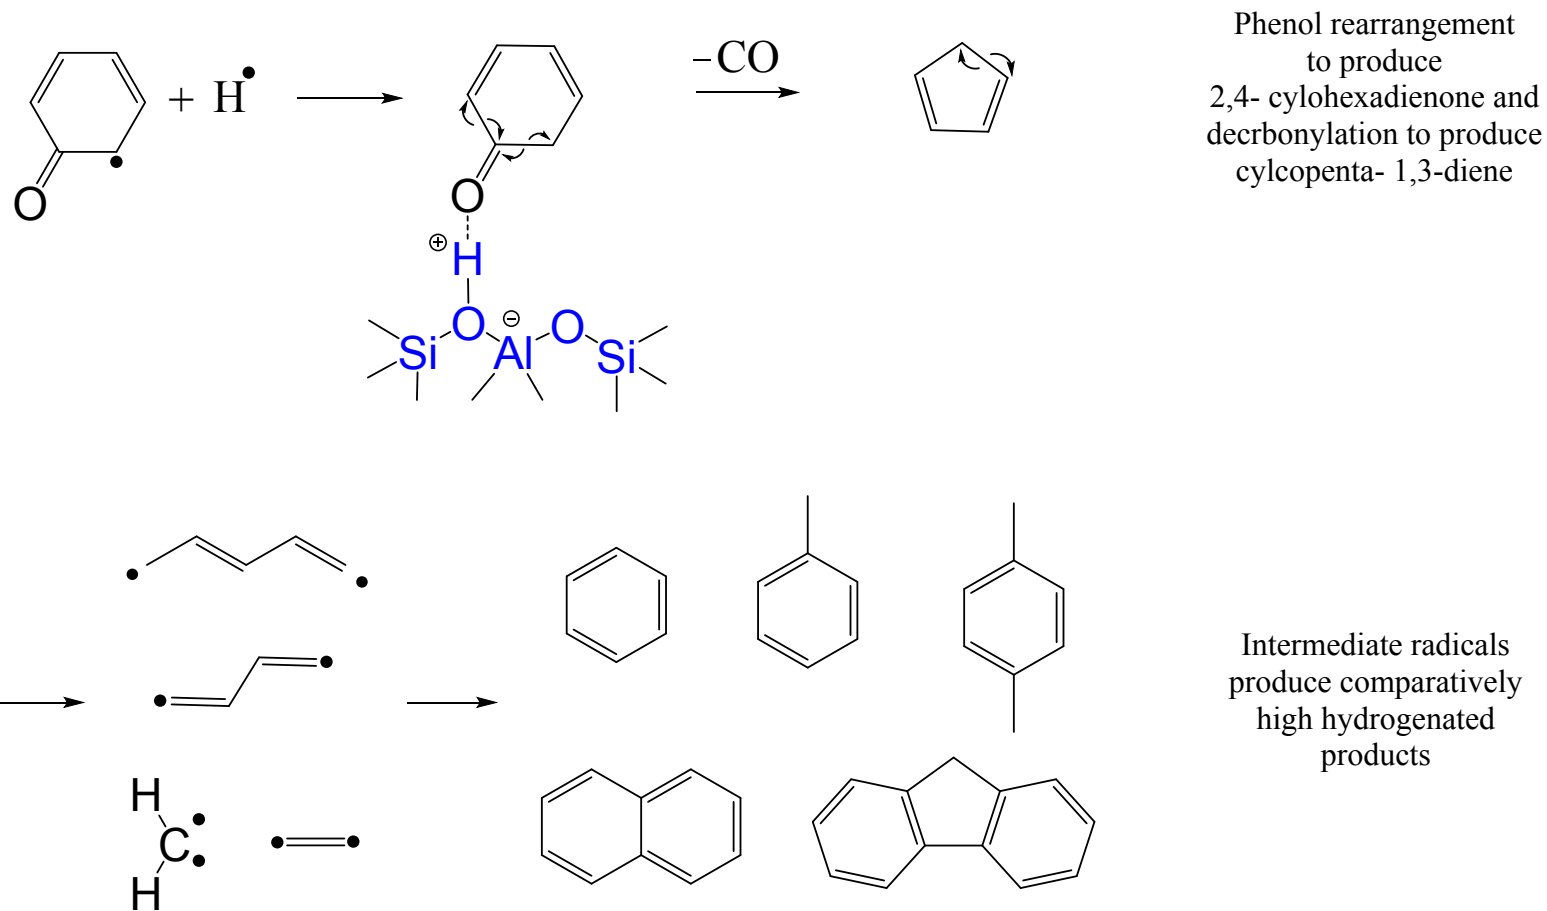

Figure S3. Proposed mechanism for secondary phenol conversion pathway via 2,4-cyclohexadienone phenol isomer (thermal route)

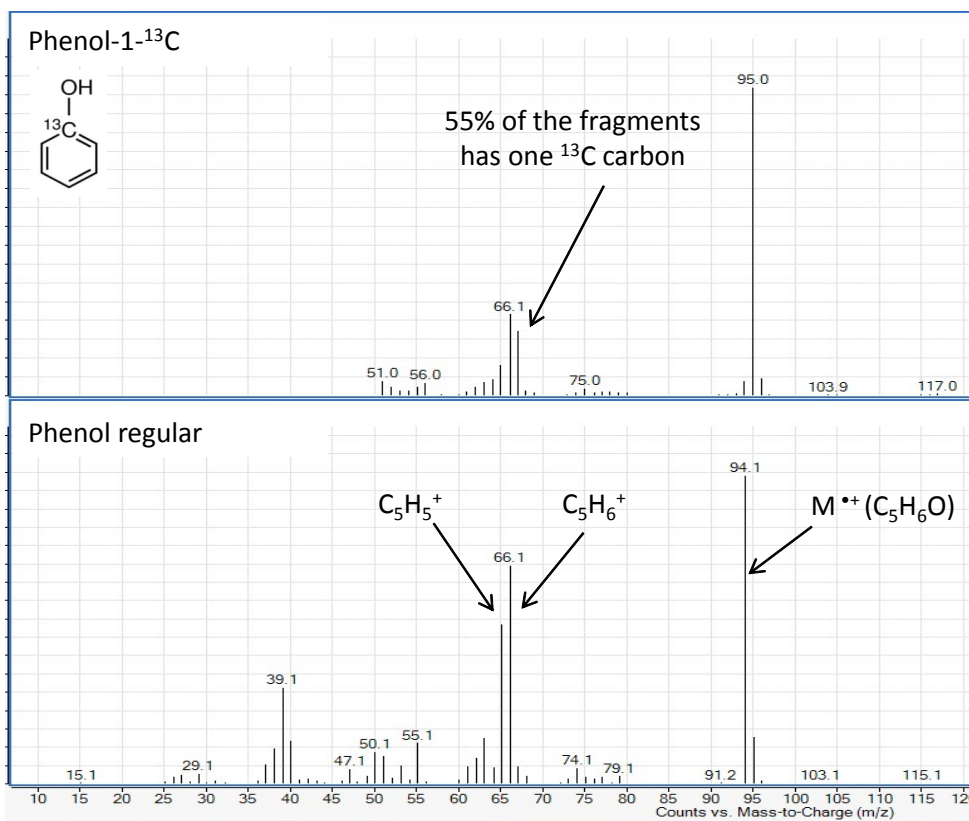

**Figure S4. MSD-EI spectrum for phenol isomerization from phenol-1-<sup>13</sup>C and regular phenol**
